# Supplementary material
Source: HighWire-hosted journal article supplement (https://care.diabetesjournals.org/content/suppl/2007/10/01/dc07-1066)

Number of events

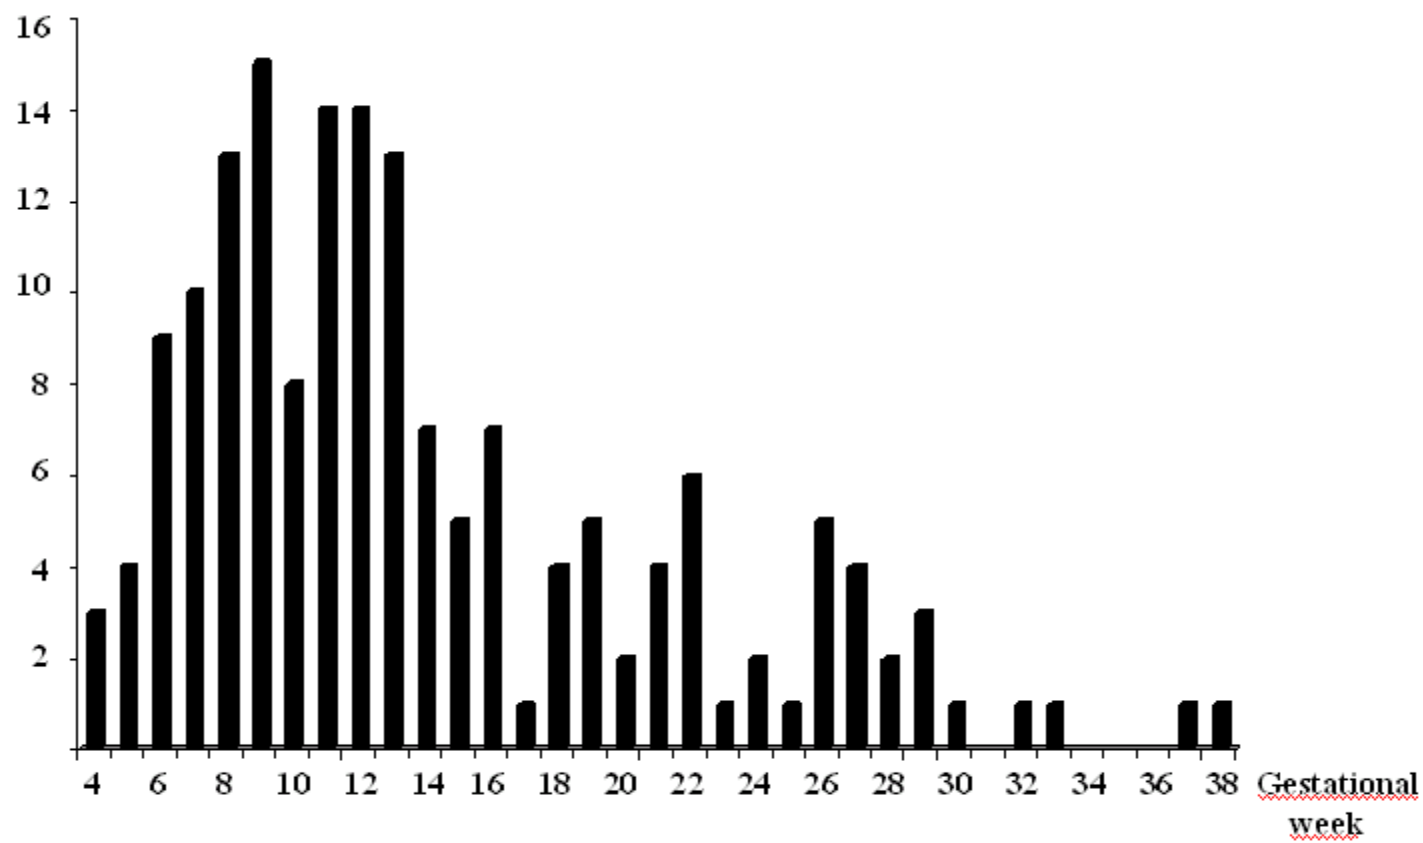

Supplement: dc071066OnlineFigure1.pdf [file dc071066OnlineFigure1.pdf]
